# Supplementary material for: Expression of <em>FAD</em> and <em>SAD</em> Genes in Developing Seeds of Flax Varieties under Different Growth Conditions
Source: Preprints.org preprint supplement (doi:10.20944/preprints202312.0947.v1), 2023-12-13
Supplement: Supplementary file 4 [file supplementary]

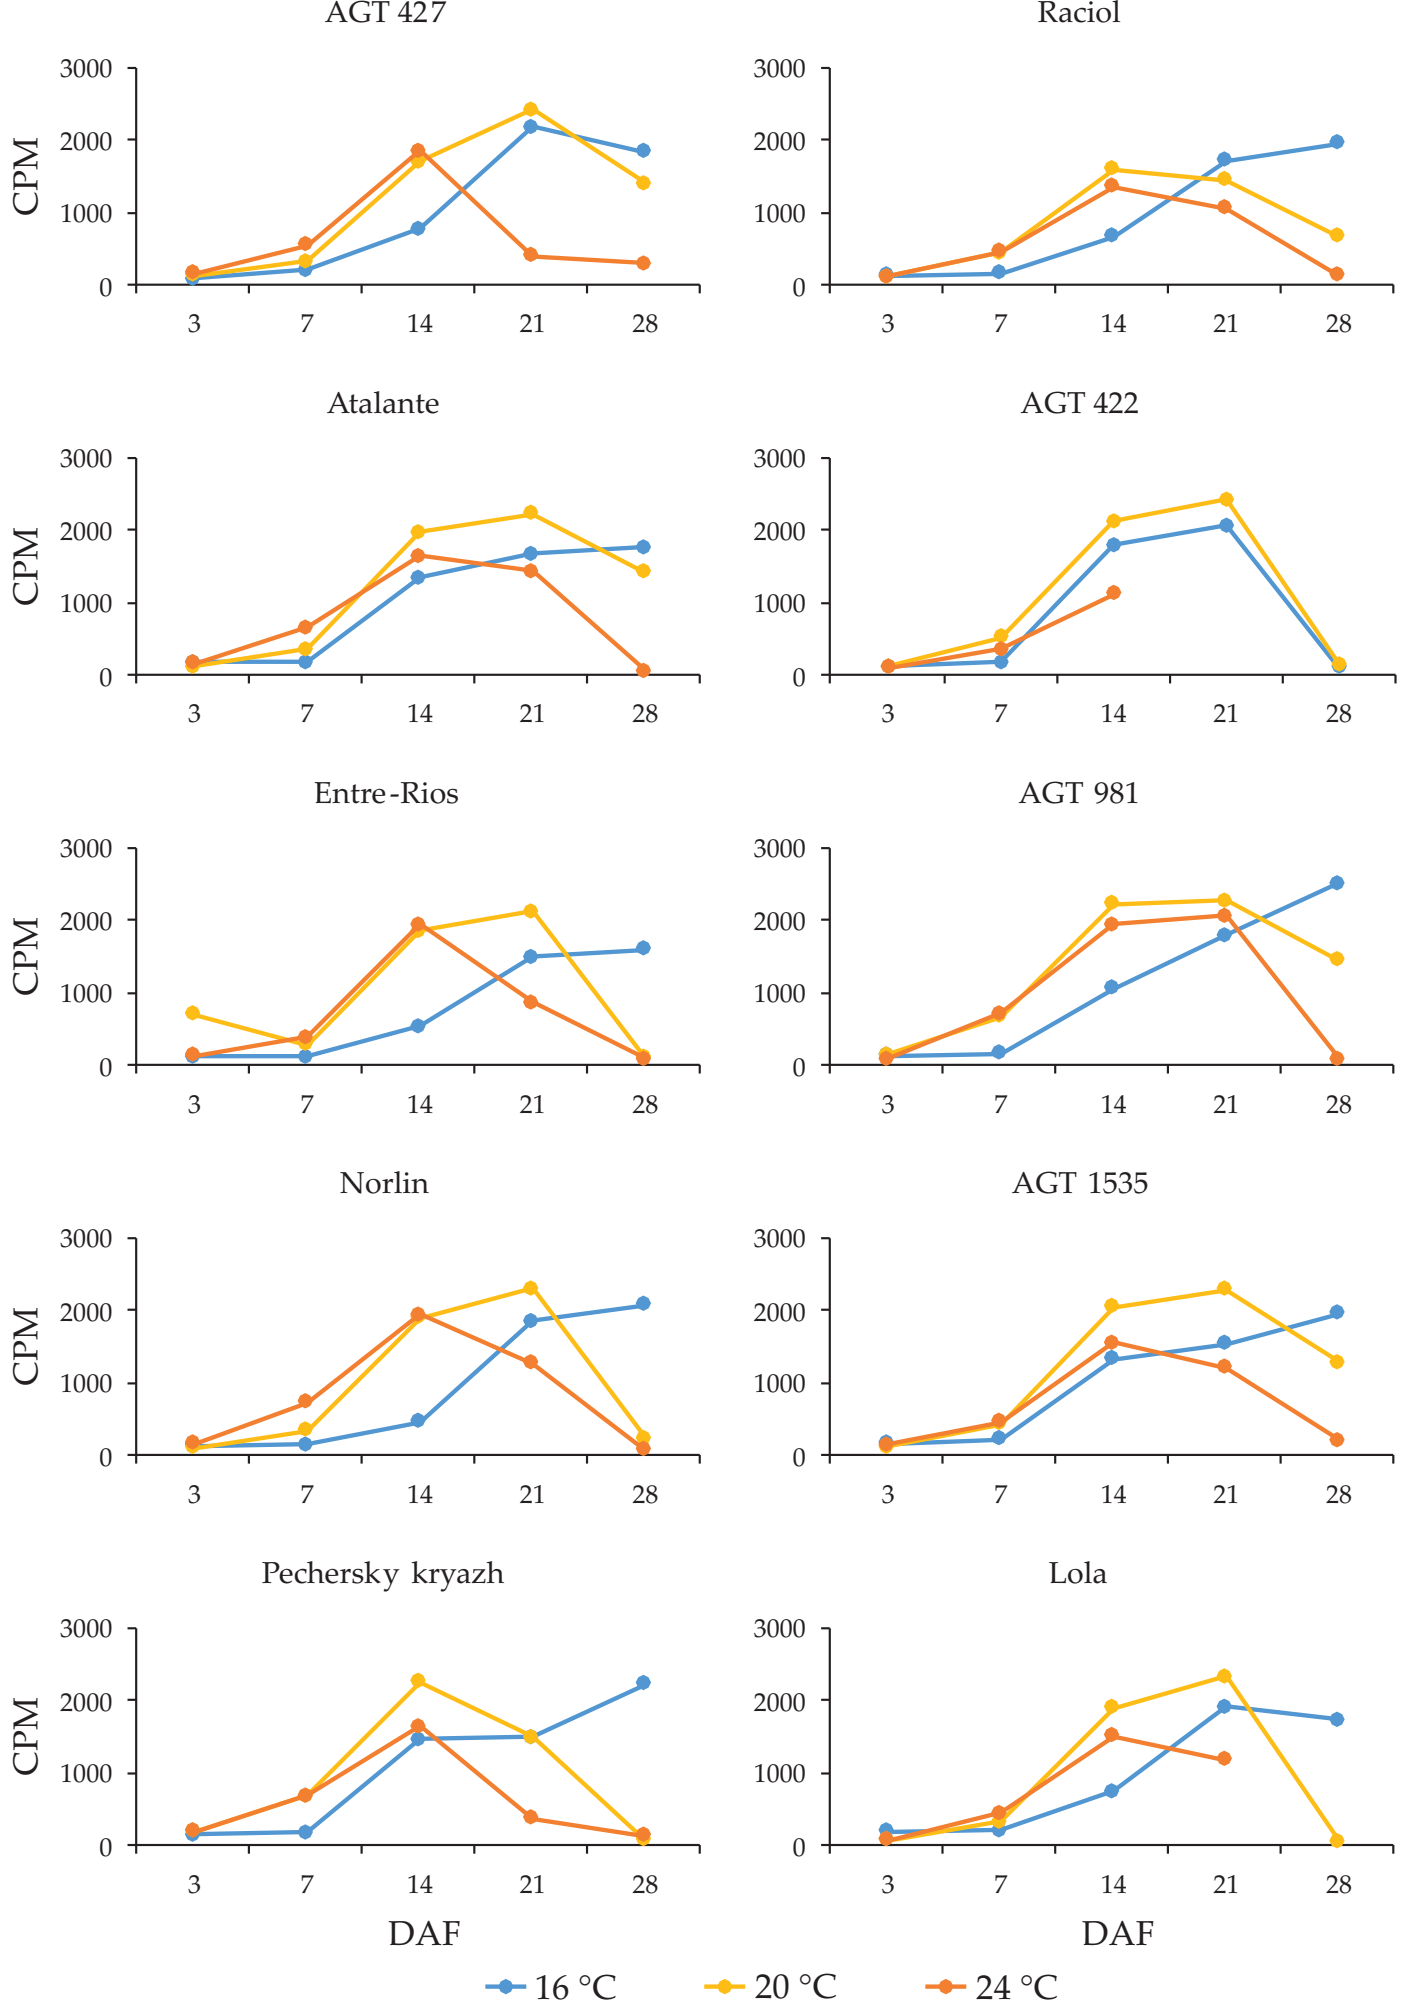

**Figure S3.** Expression profiles (3, 7, 14, 21, and 28 DAF) of the *SAD2-2* gene in high-LIN (AGT 427, Atalante, Entre-Rios, Norlin, and Pechersky kryazh), mid-LIN (Raciol and AGT 422), and low-LIN (AGT 981, AGT 1535, and Lola) flax varieties grown at 16 °C and overwatered (16 °C), 20 °C and optimal watered (20 °C), 24 °C and underwatered (24 °C). Data were missing for the 21 and 28 DAF at 24 °C for AGT 422 and the 28 DAF at 24 °C for Lola.
